# Supplementary material for: HspBP1 is a dual function regulatory protein that controls both DNA repair and apoptosis in breast cancer cells
Source: PubMed Central journal article supplement (PMC8986865; doi:10.1038/s41419-022-04766-0), 2022-04-06

**Figure 1A**

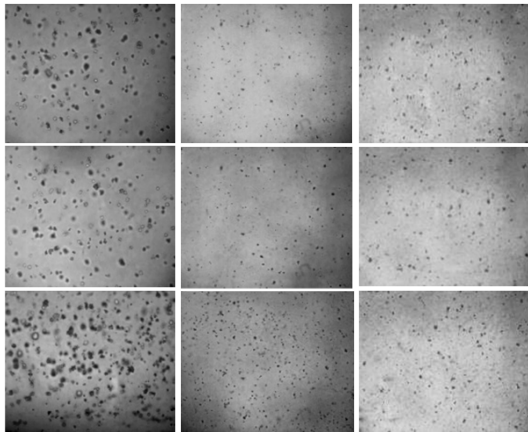

**Figure 1B**

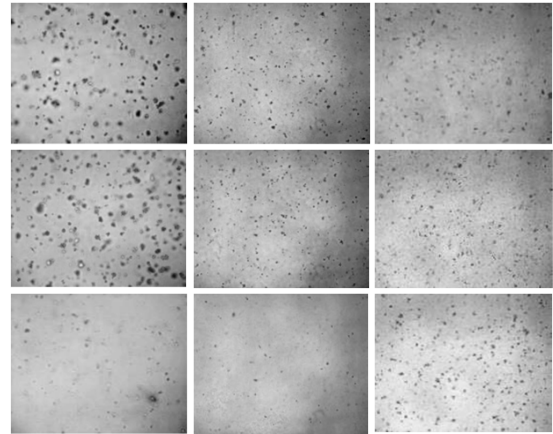

**Figure 1C**

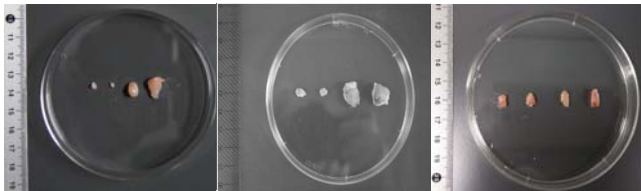

**Figure 1E**

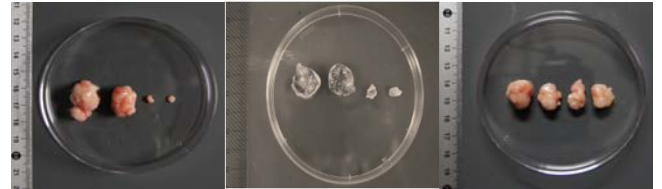

**Figure 2D**

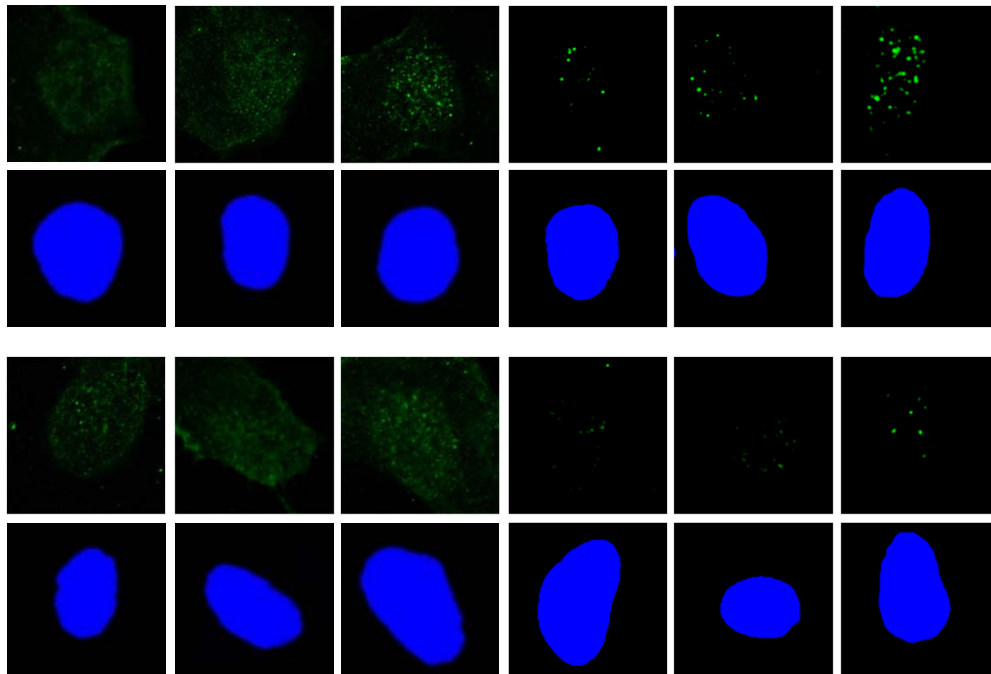

Figure 3F

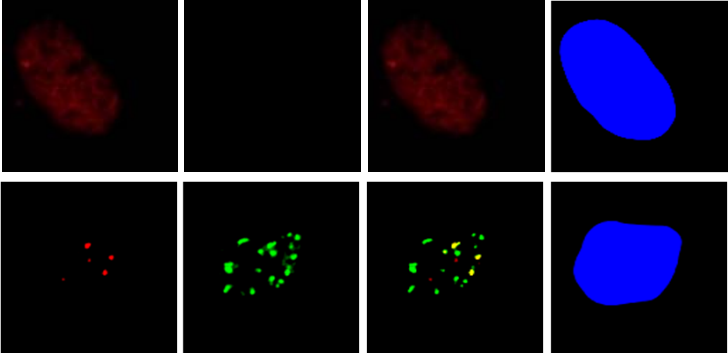

Figure4 B

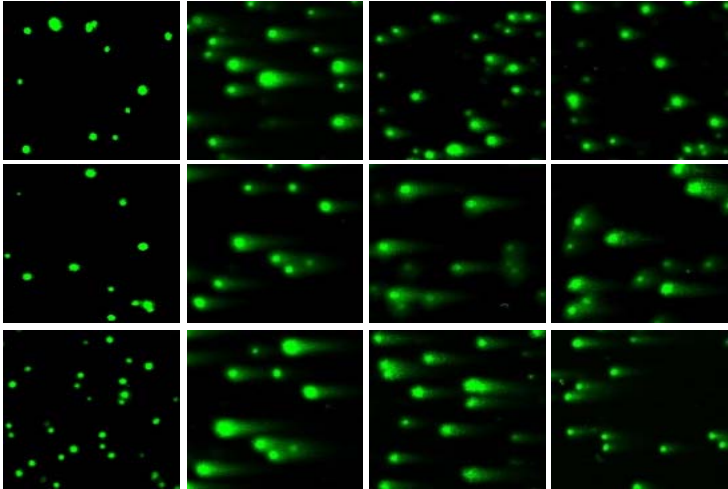

Figure 4E

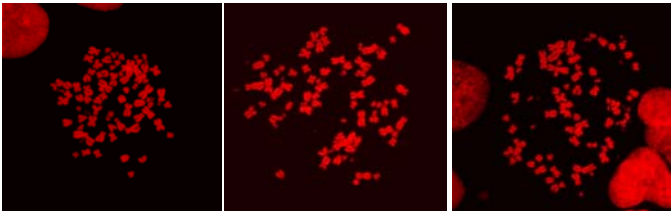

**Figure5 A**

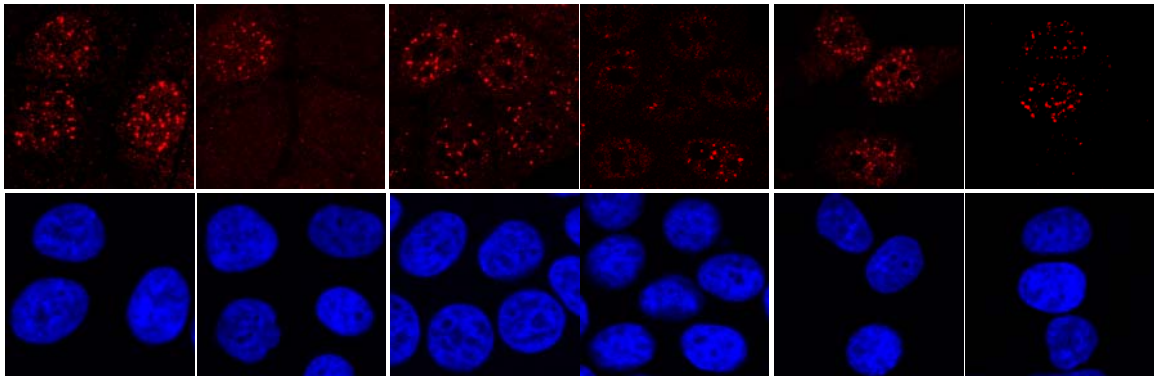

**Figure5 D**

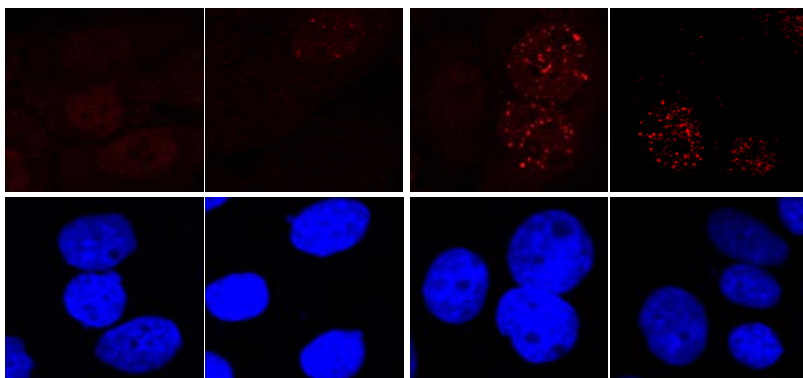

**Figure5 F**

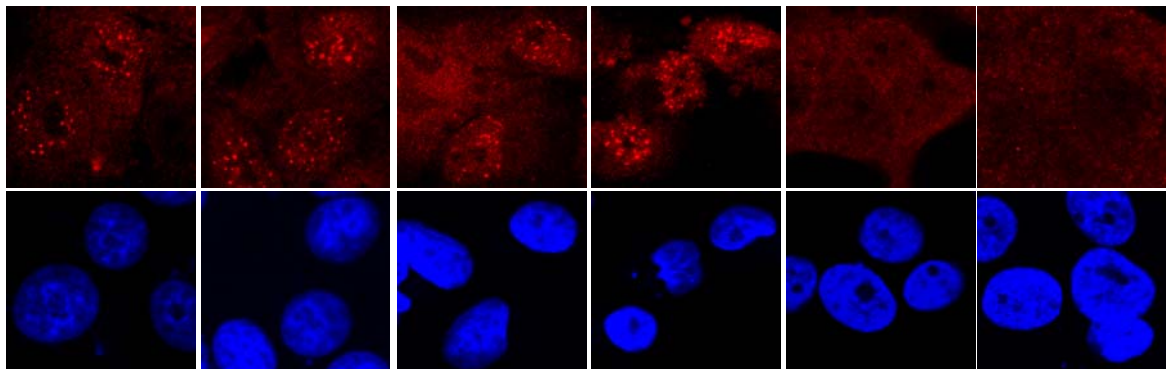

**Figure 7C**

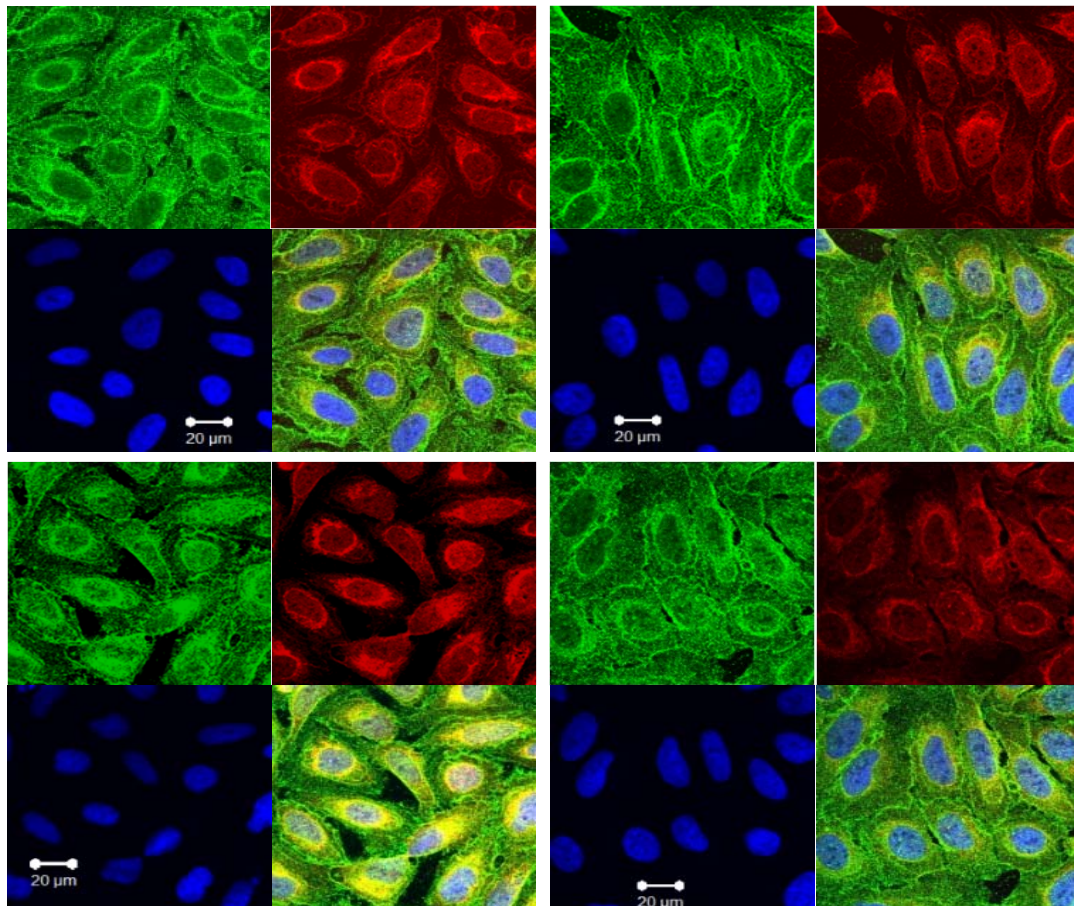

**Figure 8A**

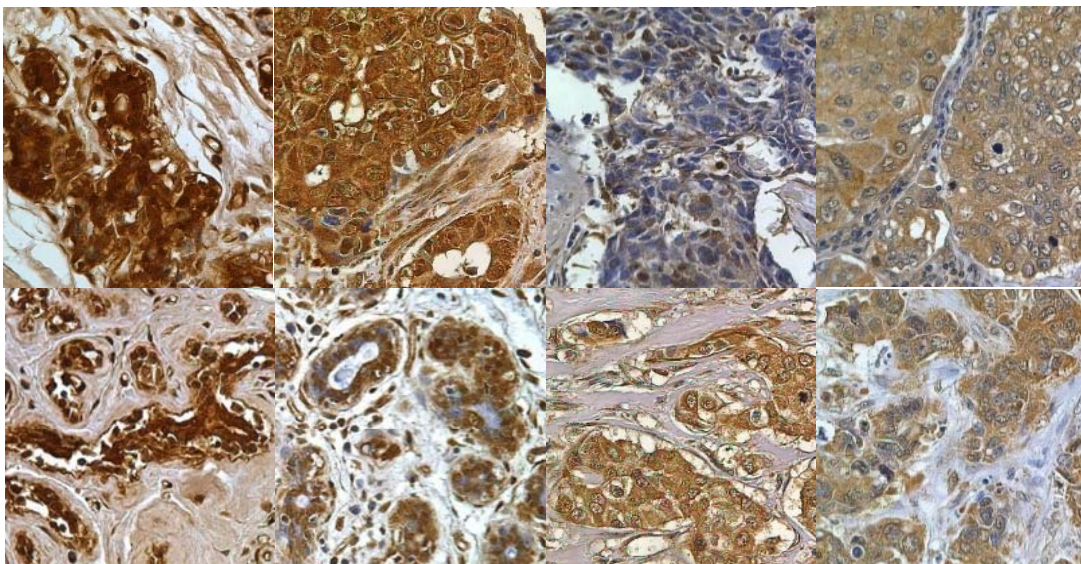

Figure S3B

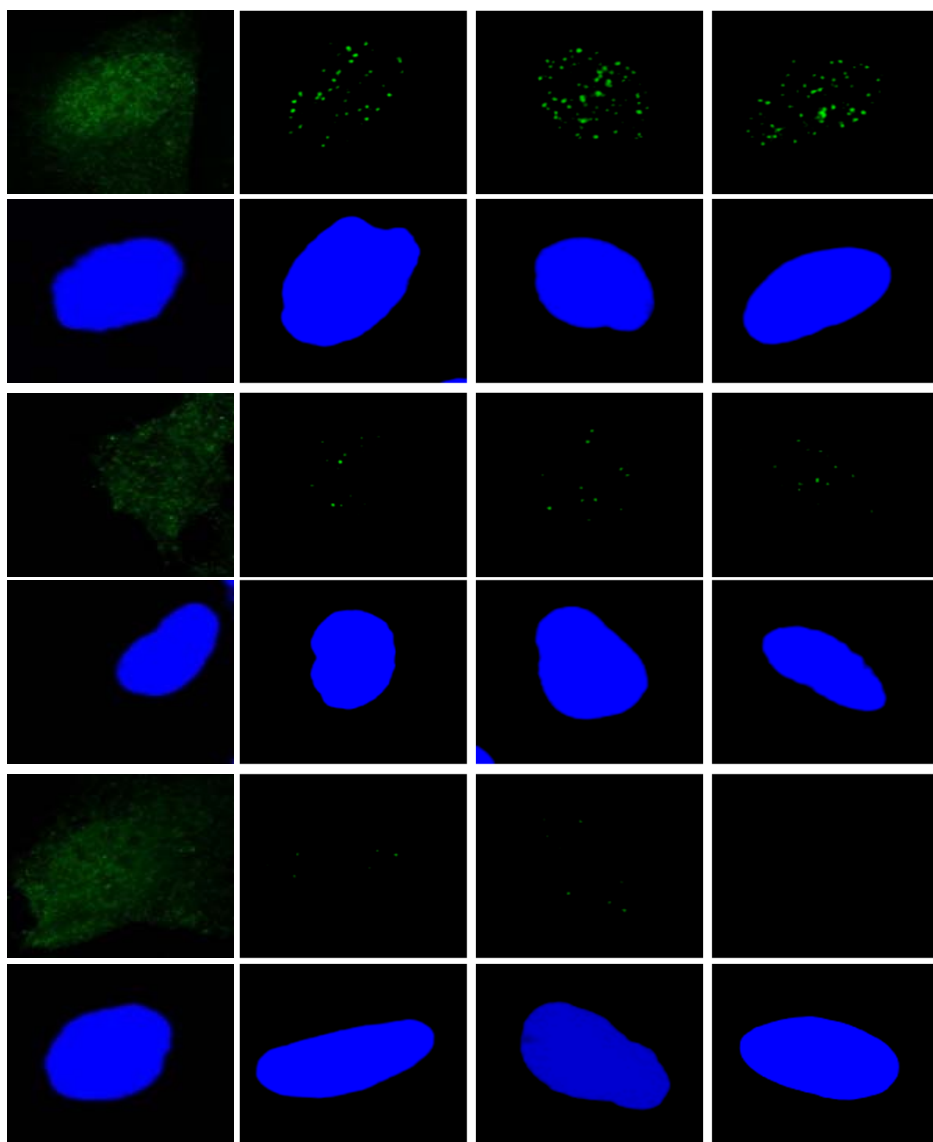

Figure S4A

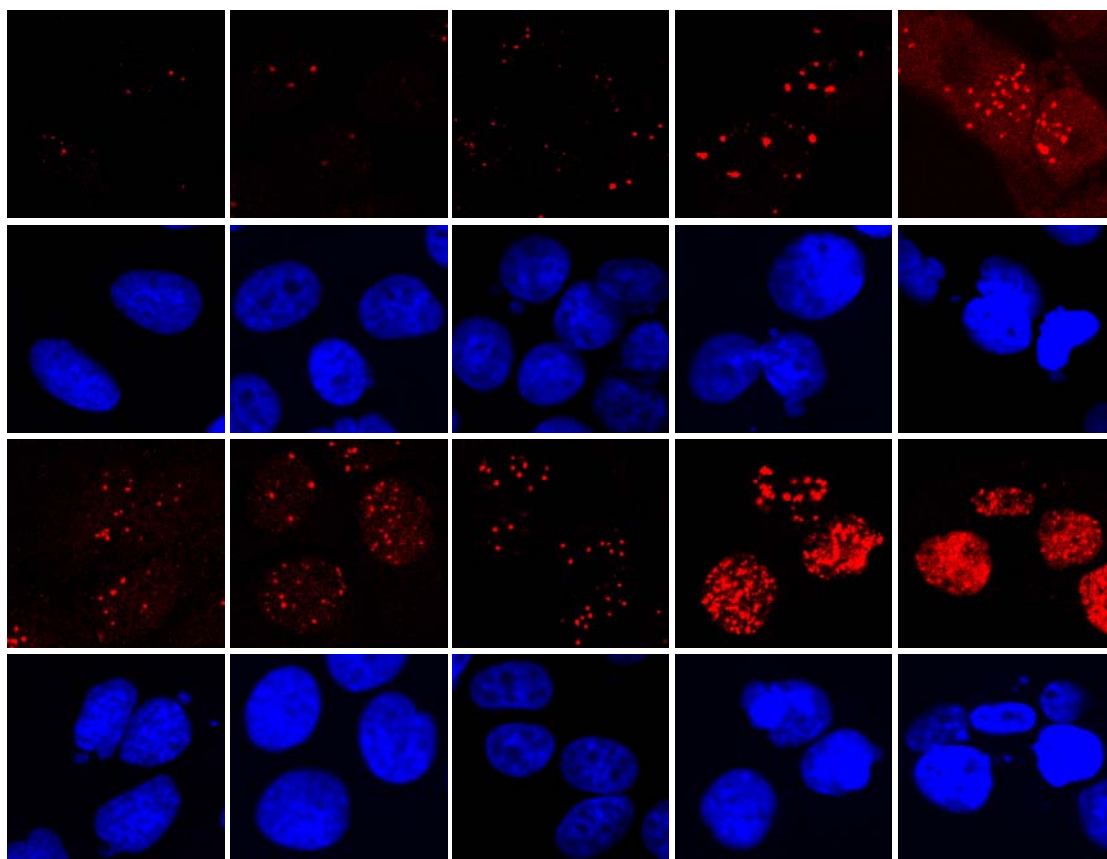

Figure S4B

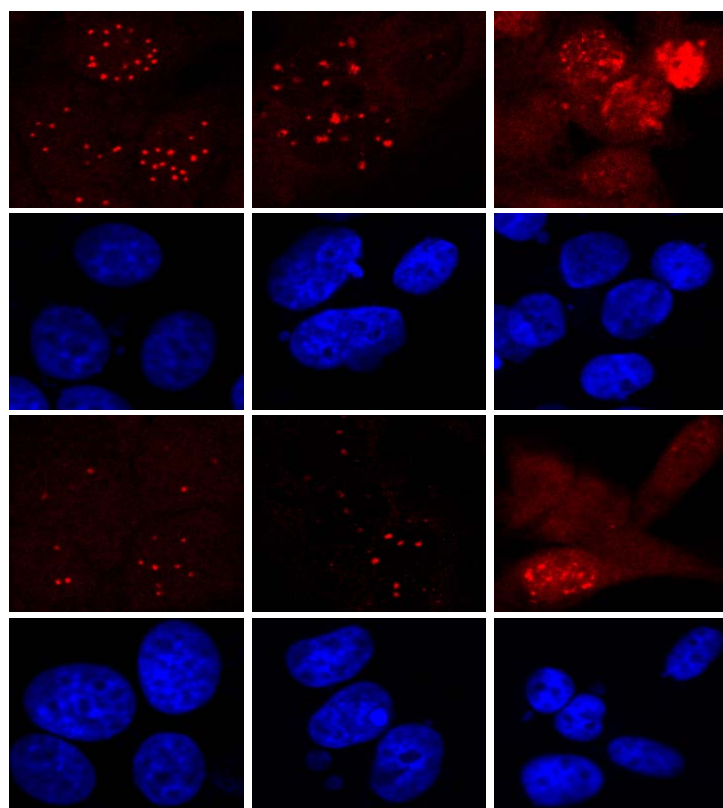

Figure S5B

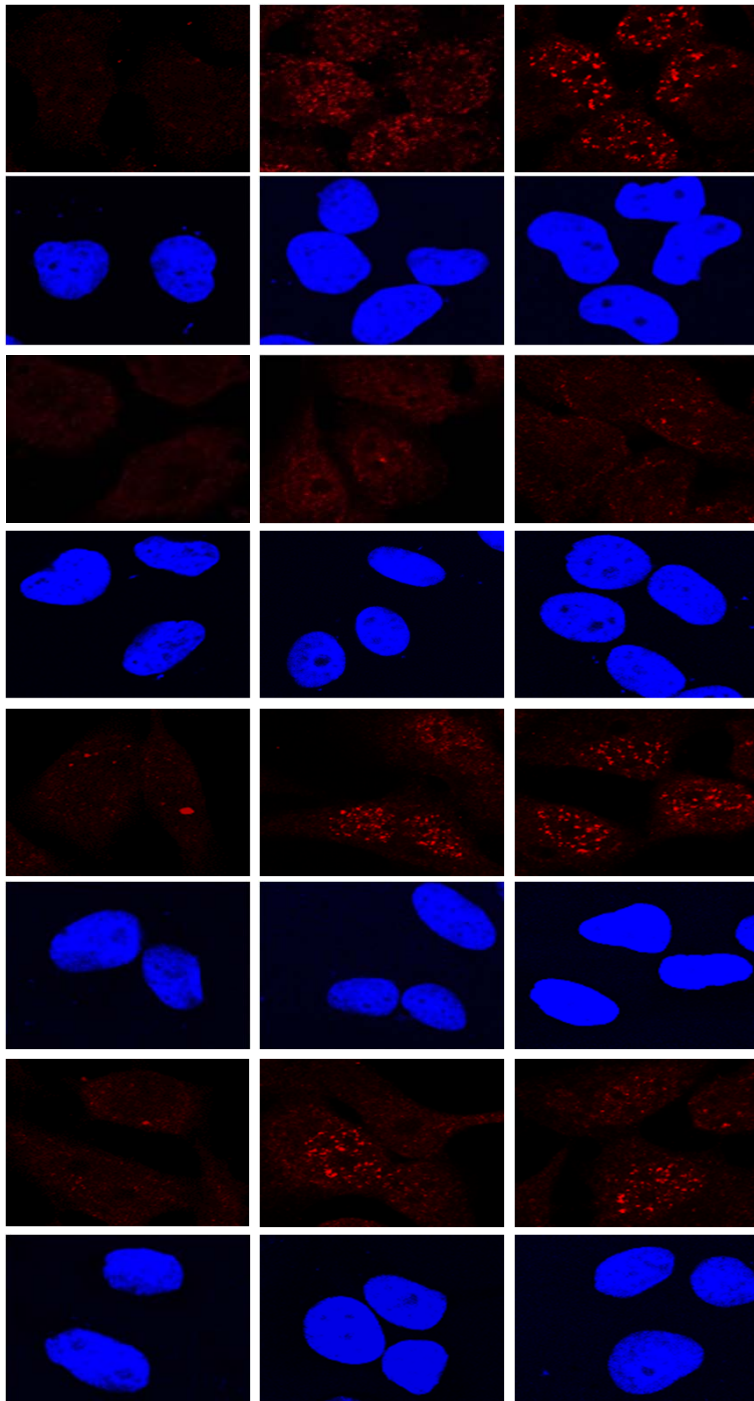

Figure S5E

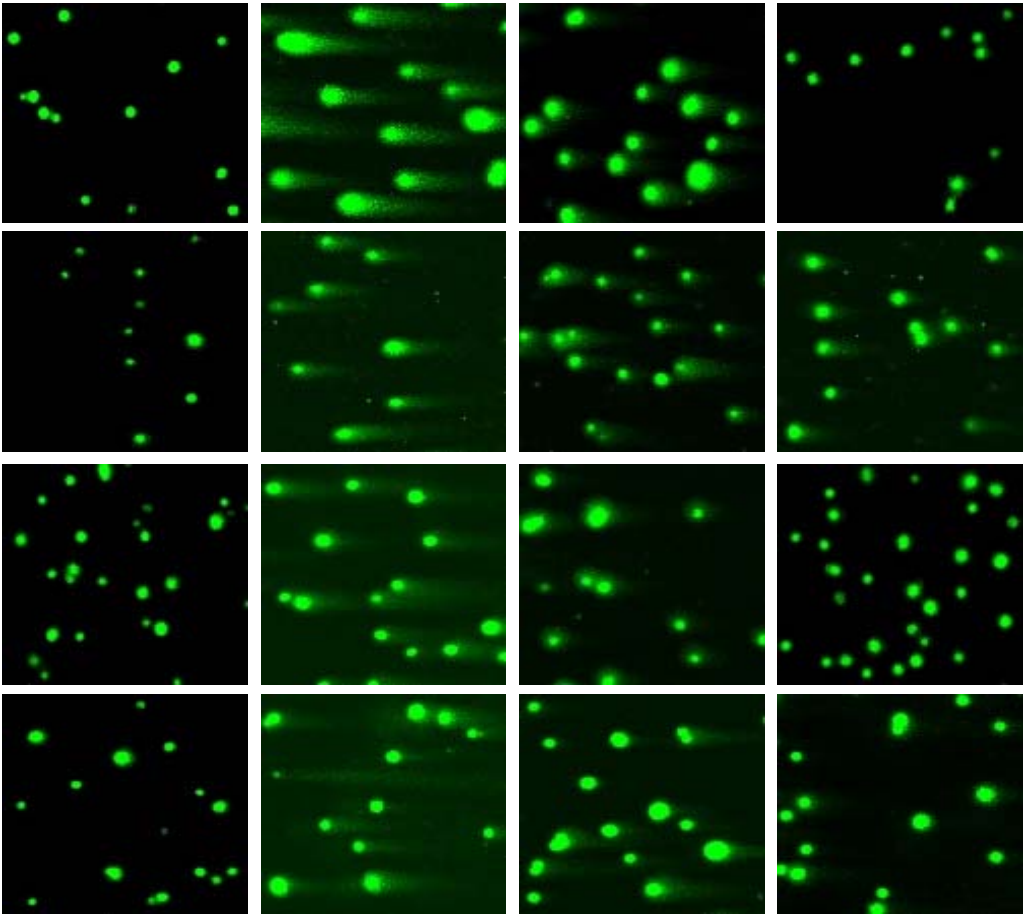

Supplement: 41419_2022_4766_MOESM3_ESM.pdf [file 41419_2022_4766_MOESM3_ESM.pdf]
